# Supplementary material
Source: PubMed Central journal article supplement (PMC3271010)
Supplement: supp_M111.298406_jbc.M111.298406-1.pdf [file supp_M111.298406_jbc.M111.298406-1.pdf]

## Online Supplemental Information

### Nitroalkenes confer acute cardioprotection via adenine nucleotide translocase 1

Sergiy M. Nadtochiy, Qiuyu Zhu, William Urciuoli, Ruslan Rafikov, Stephen M. Black, Paul S. Brookes

#### Table of contents:

#### SUPPLEMENTAL METHODS

|                                                |     |
|------------------------------------------------|-----|
| Reagents                                       | S-1 |
| Verification of ANT1 knocks down in H9c2 cells | S-1 |
| Respiration rate measurements                  | S-1 |
| TMRE/MTG fluorescence                          | S-1 |

|                  |     |
|------------------|-----|
| LITERATURE CITED | S-2 |
|------------------|-----|

#### SUPPLEMENTAL RESULTS

|           |     |
|-----------|-----|
| Table S1  | S-3 |
| Figure S1 | S-4 |
| Figure S2 | S-5 |
| Figure S3 | S-6 |
| Figure S4 | S-7 |

#### SUPPLEMENTAL METHODS

##### Reagents

Both ANT1 and mitochondrial complex II 70 kDa subunit antibodies were from MitoScience-Abcam (Cambridge, MA), anti-actin was from Calbiochem/EMD (Gibbstown NJ). Tetramethylrhodamine ethyl ester (TMRE; 555nm ex – 615nm em) and MitoTracker Green FM (MTG; 470nm ex - 535nm em) were purchased from (Molecular Probes, Eugene , OR). All other reagents were from Sigma (St. Louis MO) unless listed otherwise in the methods text.

##### Verification of ANT1 knocks down in H9c2 cells

72 hrs. post-transfection cells were washed twice with 1xPBS and lysed in 2x sample loading buffer comprised of 12mM Tris, 4% SDS, 10% glycerol, pH 6.8. Proteins were separated on 12.5% reducing SDS-PAGE, and transferred on nitrocellulose membrane followed by probing with antibodies against ANT1 (1:2000), 70 kDa complex II (1:10000) and actin (1:10000). Densitometry of ANT1, 70 kDa complex II and actin bands was performed using Scion Image software.

##### Respiration rate measurements

Respiration rates were measured in transfected cells in 24-well V7-PET plates using Seahorse XF24 Extracellular Flux analyzer (Seahorse Bioscience, Billerica MA) (1). Cells were plated at 12,000/well on Seahorse 24-well V7-PET plates in media containing 15% FBS. After 5 hrs. medium was replaced with antibiotic-free media. Cells were transfected with control or ANT1 siRNA (main methods). After 72 hrs. original media was removed and replaced with un-buffered media 30 min. before the measurements. After 8 min. of equilibration LNO<sub>2</sub> (1 μM) was injected in half of controls and half of ANT1 siRNA wells, then 10 min. later oligomycin (1 μg/ml) was injected into each well to subject cells to state 4 respiration rate.

##### TMRE/MTG fluorescence

For measurements of TMRE/MTG fluorescence, cells were plated at 20,000/plate on 35mm petri dishes with a coverglass (MatTek Corp., Ashland, MA). Cells were transfected with control or ANT1

siRNA as described in the main methods. 72 hrs. post-transfection medium was replaced with unbuffered media (in order to replicate the same conditions as used to determine respiration, in the XF-24), and cells were loaded with 100 nM MTG and incubated for 30 min. at +37°C. Cells were then washed twice and loaded with 20 nM TMRE for 30 min. at +37°C. Fluorescence microscopy was performed using an Eclipse TE2000-S (Nikon, Avon MA). Images were taken using 40x oil objectives. TMRE/MTG ratios were measured at three different time-points: (i) before addition of agents; (ii) 15 min. oligomycin (1µg/ml); and (iii) 15 min. LNO<sub>2</sub> (1µM) in the presence of oligomycin. To ensure valid TMRE labeling, FCCP (1µM) was added at the end of each experimental run to collapse mitochondrial membrane potential and fully dissipate TMRE fluorescence. Data were analyzed using TILL Photonics Imaging System Software.

## LITERATURE CITED

1. Gerencser, A. A., Neilson, A., Choi, S. W., Edman, U., Yadava, N., Oh, R. J., Ferrick, D. A., Nicholls, D. G., and Brand, M. D. (2009) *Anal. Chem.* **81**, 6868-6878

## SUPPLEMENTAL RESULTS

**Table S1. MS/MS fragmentation of G<sub>53</sub>IIDC\*VVR<sub>60</sub> peptide of ANT1 with biotinylated Cys.**  
Colored numbers represent masses found in MS/MS (Figure 3) with mass error less than 0.3 ppm.

| #  | l   | b    | b-H <sub>2</sub> O | a    | c    | Seq | y    | y-H <sub>2</sub> O | z    | z'   | y(2+) | #  |
|----|-----|------|--------------------|------|------|-----|------|--------------------|------|------|-------|----|
| 53 | 86  | 58   | 40                 | 30   | 75   | G   | 1381 | 1363               | 1364 | 1365 | 691   | 60 |
| 54 | 86  | 171  | 153                | 143  | 188  | I   | 1268 | 1250               | 1251 | 1252 | 635   | 59 |
| 55 | 86  | 284  | 266                | 256  | 301  | I   | 1155 | 1137               | 1138 | 1139 | 578   | 58 |
| 56 | 88  | 399  | 381                | 371  | 416  | D   | 1040 | 1022               | 1023 | 1024 | 520   | 57 |
| 57 | 639 | 1065 | 1048               | 1038 | 1083 | C*  | 373  | 355                | 356  | 357  | 187   | 56 |
| 58 | 72  | 1165 | 1147               | 1136 | 1182 | V   | 274  | 256                | 257  | 258  | 138   | 55 |
| 59 | 72  | 1264 | 1246               | 1236 | 1281 | V   | 175  | 157                | 158  | 159  | 88    | 54 |
| 60 | 129 |      |                    |      |      | R   |      |                    |      |      |       | 53 |

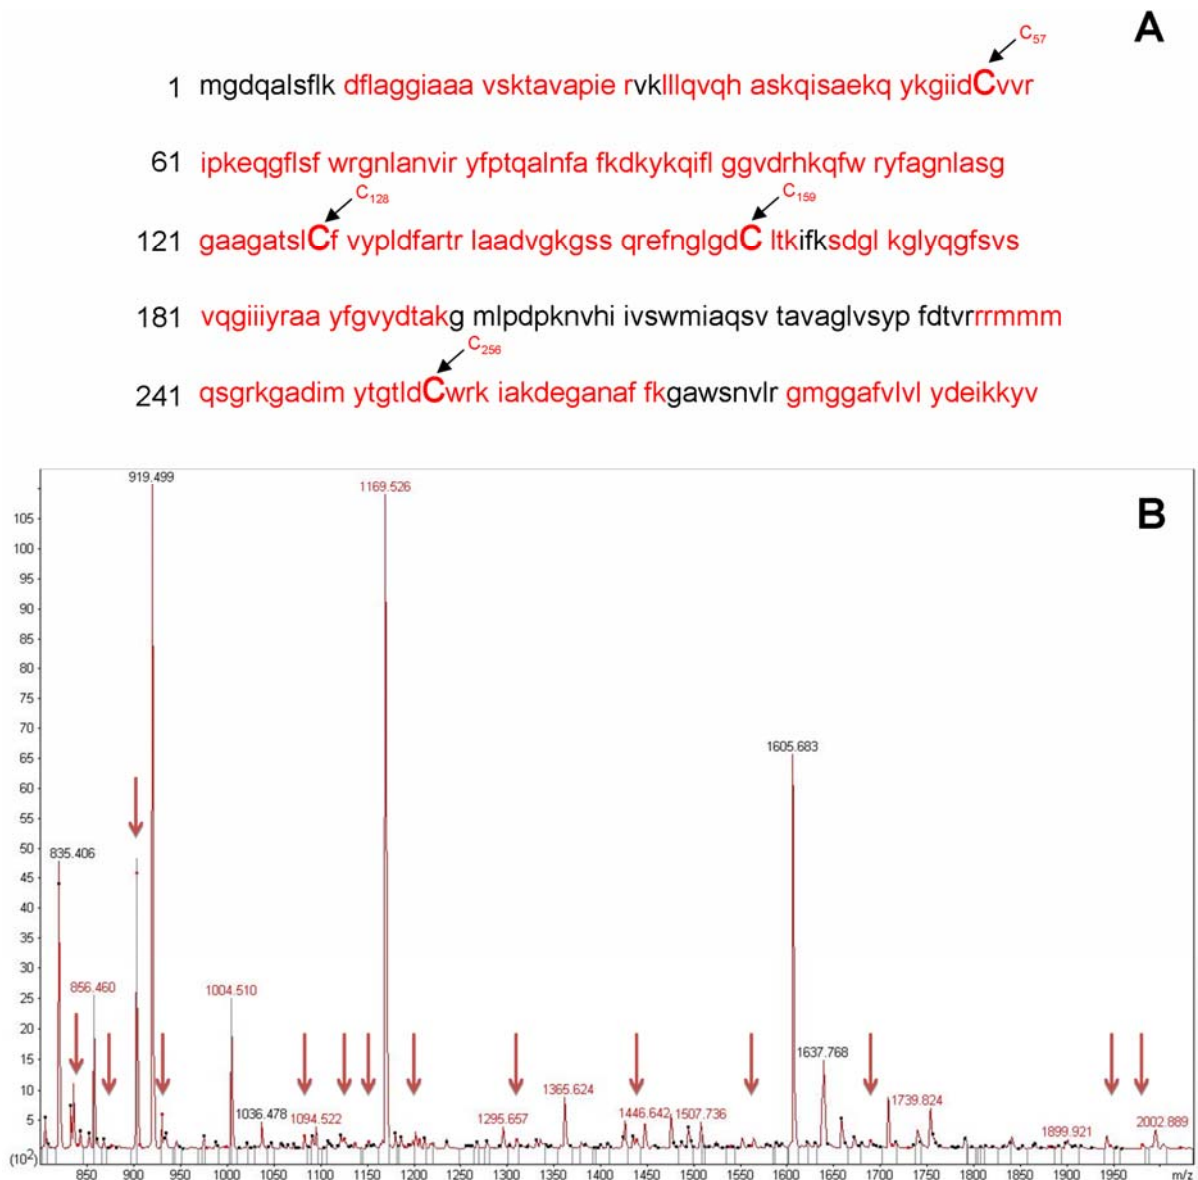

**Figure S1. ANT1 protein coverage map and mass spectrometry. (A):** Red colored amino acids indicate peptides found in MALDI-TOF MS analysis of in-gel tryptic digest from band corresponding to ANT1 (~32kDa). The ANT1 sequence is that for mouse (gi: 148747424). **(B):** Mass spectrometry of the gel band from biotinylated protein pull-down experiment (Fig. 2B). Tryptic digest peptide masses originating from ANT1 protein are indicated as brown-red (values for highly abundant peptides, and arrows for low abundance peptides).

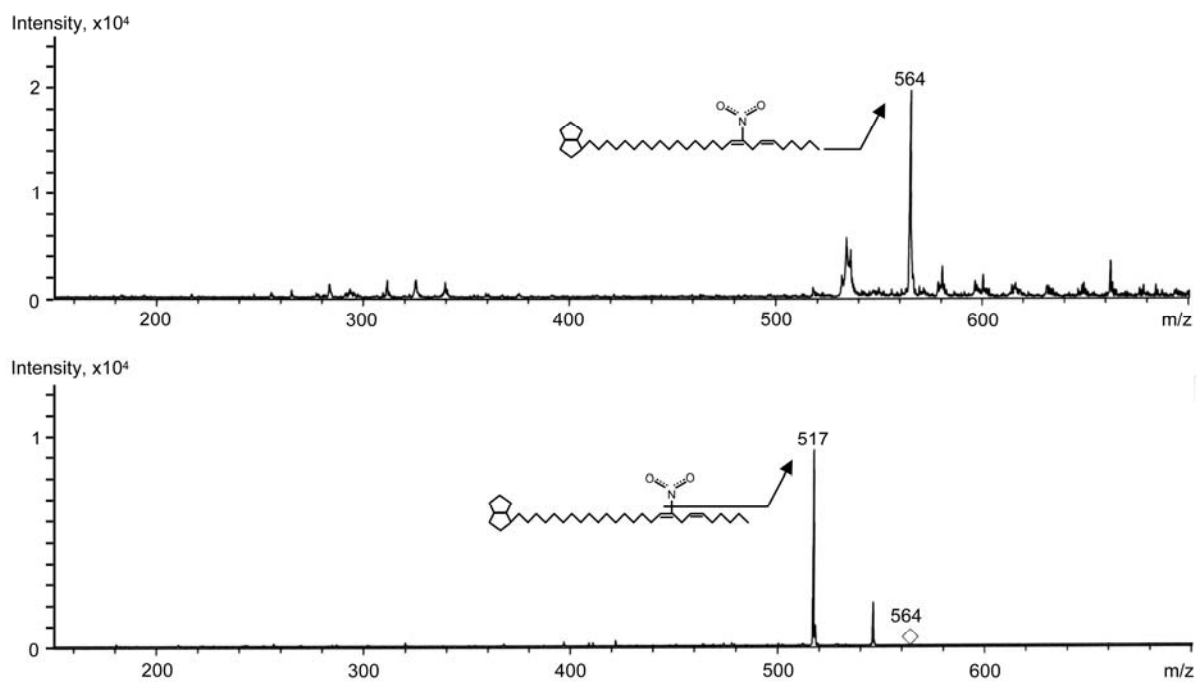

**Figure S2. MS analysis of Bt-LNO<sub>2</sub>.** Synthetic Bt-LNO<sub>2</sub> was analyzed by direct infusion on a Bruker Daltonics MS/MS system, in negative ion mode. Single reaction monitoring was used to detect species undergoing loss of m/z 46 (NO<sub>2</sub> group). Parent spectrum (Bt-LNO<sub>2</sub>, m/z 564) is shown in upper panel, and daughter spectrum (Bt-LA, m/z 517) in the lower panel.

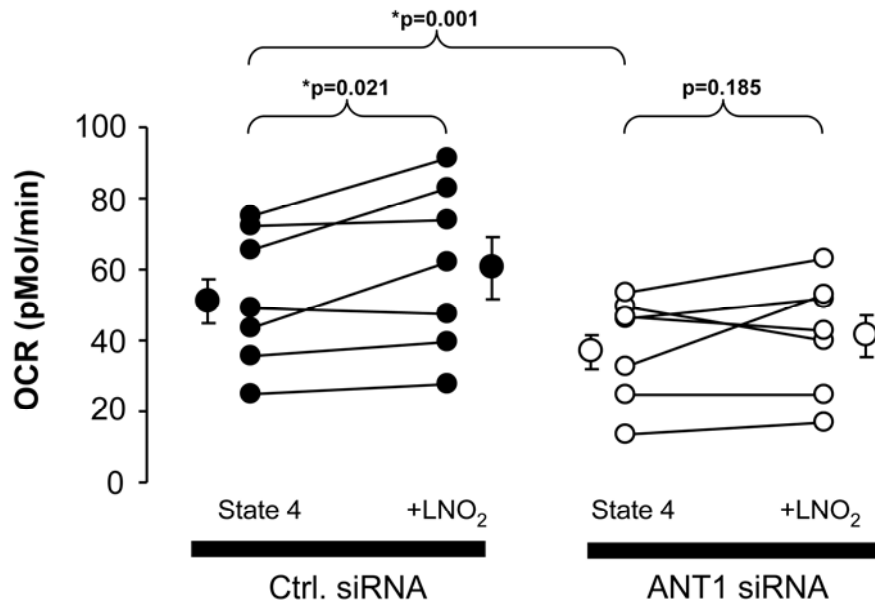

**Figure S3. State 4 respiration rate in H9c2 cells.** Oxygen consumption rate (OCR) was measured using a Seahorse Biosciences XF-24 analyzer, as detailed in the methods. All data are for enforced state 4 respiration, in the presence of oligomycin. LNO<sub>2</sub> (1  $\mu$ M) was present where indicated). Individual data points (n=7), connected by lines show the effect of LNO<sub>2</sub> addition in each case, with average values ( $\pm$ SEM) shown adjacent to these points. Statistical significance between groups (paired *t*-test) is shown above the data.

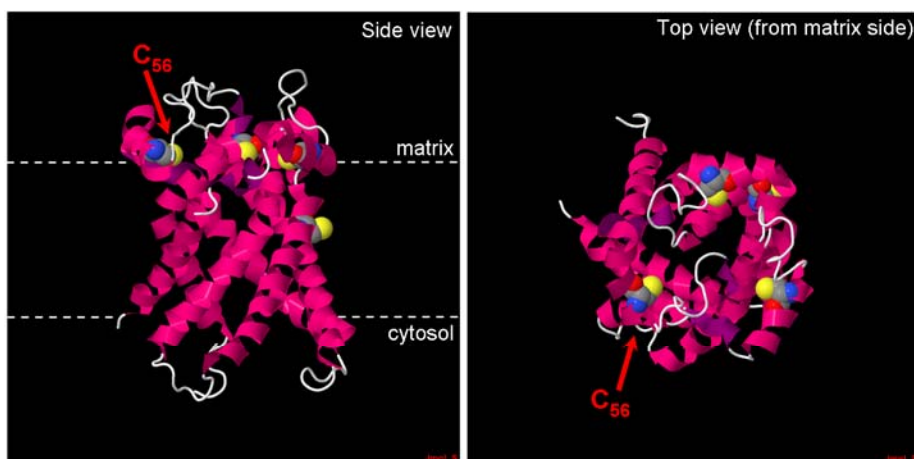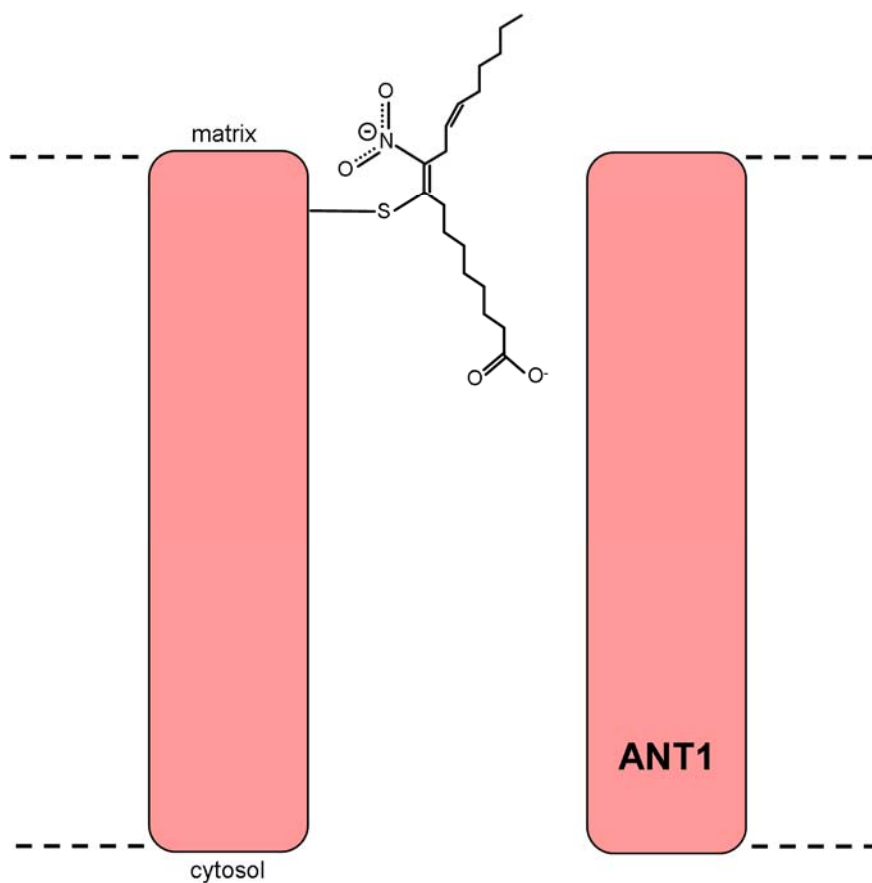

**Figure S4. ANT1 structure and localization of modified cysteine.** Crystal structure of bovine ANT1 at 2.8 Å resolution was obtained from the protein database ([dx.doi.org/10.2210/pdb2c3e/pdb](https://dx.doi.org/10.2210/pdb2c3e/pdb)). Images were rendered in Jmol ([jmol.sourceforge.net/](http://jmol.sourceforge.net/)). Backbone of the structure is shown as ribbons (pink), with the four cysteine residues highlighted in ball-and-stick formation. The position of C<sub>56</sub> is indicated by the arrows (Note, C<sub>56</sub> in the bovine protein corresponds to C<sub>57</sub> in mouse ANT1). Dotted lines denote position of the membrane, with the matrix and cytosol indicated for orientation. Left panel shows side view, right panel shows top view from the matrix side, indicating the position of C<sub>56</sub> with the thiol facing the central membrane-spanning pore of the protein. Lower panel shows a theoretical location of nitro-linoleate adduct in the ANT structure, indicating the presence of the electronegative nitro group.
